# Supplementary material for: Medicines Acceptability in Hospitalized Children: An Ongoing Need for Age-Appropriate Formulations
Source: PubMed Central journal article supplement (PMC7463451; doi:10.3390/pharmaceutics12080766), 2020-08-13
Supplement: pharmaceutics-12-00766-s001.pdf [file pharmaceutics-12-00766-s001.pdf]

# Supplementary Materials: Medicines Acceptability in Hospitalized Children: an Ongoing Need for Age-Appropriate Formulations

Thibault Vallet <sup>1,\*</sup>, Omar Elhamdaoui <sup>2,3</sup>, Amina Berraho <sup>2,3</sup>, Lalla Ouafae Cherkaoui <sup>2,3</sup>, Yamna Kriouile <sup>2,4</sup>, Chafiq Mahraoui <sup>2,4</sup>, Nezha Mouane <sup>2,4</sup>, Anne-Marie Pense-Lheritier <sup>5</sup>, Fabrice Ruiz <sup>1</sup>, Yahya Bensouda <sup>2,3</sup>

<sup>1</sup> ClinSearch, 110 Avenue Pierre Brossolette, 92240 Malakoff, France; fabrice.ruiz@clinsearch.net

<sup>2</sup> Faculty of Pharmacy and Medicine, Mohammed V University in Rabat, Impasse Souissi, 10170 Rabat, Morocco; omar.elhamdaoui@um5s.net.ma (O.E.); a.berraho@um5s.net.ma (A.B.); o.cherkaoui@um5s.net.ma (L.A.C.); y.kriouile@um5s.net.ma (Y.K.); c.mahraoui@um5s.net.ma (C.M.); n.mouane@um5s.net.ma (N.M.); y.bensouda@um5s.net.ma (Y.B.)

<sup>3</sup> Specialties Hospital, University Medical Centre Ibn Sina (CHIS), Quartier Souissi, 10170 Rabat, Morocco

<sup>4</sup> Pediatrics Hospital, University Medical Centre Ibn Sina (CHIS), Avenue Ibn Rochd, 10100 Rabat, Morocco

<sup>5</sup> EBInnov, Ecole de Biologie Industrielle (EBI), 49 Avenue des Genottes, 95800 Cergy-Pontoise, France; am.lheritier@hubebi.com

\* Correspondence: thibault.vallet@clinsearch.net; Tel.: +33(0) 1 47 35 17 17 (T.V.)

Received: 30 June 2020; Accepted: 10 August 2020; Published: date

---

**Table 1.** Therapeutic areas and formulations of drugs for the 570 evaluations collected in the Moroccan hospitals, stratified by patient age.

| Therapeutic Areas       | Drugs                                     | Formulations                 | Evaluations (N) | Distrubution By Age Group (%) |           |            |             |
|-------------------------|-------------------------------------------|------------------------------|-----------------|-------------------------------|-----------|------------|-------------|
|                         |                                           |                              |                 | [Birth:2y.]                   | [3y.:5y.] | [6y.:11y.] | [12y.:16y.] |
| Antibacterials          | <i>Fusidic acid</i>                       | Oral suspension              | 44              | 25                            | 30        | 36         | 9           |
|                         | <i>Josamycin</i>                          | Granules for oral suspension | 39              | 59                            | 28        | 13         | 0           |
|                         | <i>Cefixime</i>                           | Powder for oral suspension   | 36              | 8                             | 50        | 39         | 3           |
|                         | <i>Co-amoxiclav</i>                       | Powder for oral suspension   | 13              | 23                            | 54        | 15         | 8           |
|                         | <i>Sulfamethoxazole and trimethoprim</i>  | Oral suspension              | 4               | 50                            | 0         | 50         | 0           |
|                         |                                           | Tablet                       | 3               | 0                             | 0         | 100        | 0           |
| <i>Ciprofloxacin</i>    | Tablet                                    | 2                            | 0               | 0                             | 0         | 100        |             |
| Corticosteroids         | <i>Prednisolone</i>                       | Effervescent tablet          | 67              | 37                            | 42        | 18         | 3           |
|                         | <i>Betamethasone</i>                      | Drops for oral solution      | 47              | 43                            | 26        | 28         | 4           |
|                         | <i>Prednisone</i>                         | Tablet                       | 4               | 0                             | 25        | 50         | 25          |
|                         | <i>Hydrocortisone</i>                     | Tablet                       | 1               | 100                           | 0         | 0          | 0           |
| Antiepileptics          | <i>Valproic acid</i>                      | Syrup                        | 67              | 37                            | 27        | 25         | 10          |
|                         |                                           | Oral solution                | 3               | 67                            | 0         | 33         | 0           |
|                         | <i>Phenobarbital</i>                      | Tablet                       | 29              | 48                            | 31        | 21         | 0           |
|                         | <i>Levetiracetam</i>                      | Tablet                       | 6               | 83                            | 17        | 0          | 0           |
|                         | <i>Lamotrigine</i>                        | Dispersible tablet           | 1               | 0                             | 100       | 0          | 0           |
| Antithrombotic agents   | <i>Acenocoumarol</i>                      | Tablet                       | 34              | 6                             | 29        | 53         | 12          |
| Antianemic preparations | <i>Ferric proteinsuccinylate</i>          | Oral solution                | 12              | 75                            | 0         | 17         | 8           |
|                         | <i>Ferric oxide polymaltose complexes</i> | Syrup                        | 12              | 67                            | 25        | 8          | 0           |
| Antivirals              | <i>Zidovudine and lamivudine</i>          | Tablet                       | 9               | 56                            | 22        | 0          | 22          |
|                         | <i>Efavirenz</i>                          | Tablet                       | 7               | 29                            | 14        | 14         | 43          |
|                         | <i>Lopinavir and ritonavir</i>            | Oral solution                | 5               | 60                            | 20        | 0          | 20          |
|                         | <i>Lamivudine</i>                         | Tablet                       | 2               | 0                             | 0         | 50         | 50          |

|                                       |                                                           |                          |    |     |     |     |     |
|---------------------------------------|-----------------------------------------------------------|--------------------------|----|-----|-----|-----|-----|
| Psycholeptics                         | <i>Clobazam</i>                                           | Tablet                   | 16 | 25  | 38  | 38  | 0   |
|                                       | <i>Haloperidol</i>                                        | Oral solution            | 3  | 33  | 0   | 67  | 0   |
|                                       | <i>Hydroxyzine</i>                                        | Syrup                    | 1  | 0   | 100 | 0   | 0   |
| Analgesics                            | <i>Paracetamol</i>                                        | Powder for oral solution | 10 | 0   | 30  | 70  | 0   |
|                                       |                                                           | Oral solution            | 6  | 17  | 33  | 50  | 0   |
|                                       |                                                           | Tablet                   | 1  | 0   | 0   | 100 | 0   |
|                                       | <i>Codeine, combinations excl. Psycholeptics</i>          | Tablet                   | 1  | 0   | 100 | 0   | 0   |
| Ophthalmologicals                     | <i>Acetazolamide</i>                                      | Tablet                   | 14 | 0   | 7   | 86  | 7   |
| Muscle relaxants                      | <i>Baclofen</i>                                           | Tablet                   | 13 | 8   | 23  | 31  | 38  |
| Antimycobacterials                    | <i>Rifampicin, pyrazinamide, ethambutol and isoniazid</i> | Tablet                   | 10 | 20  | 40  | 20  | 20  |
| Mineral supplements                   | <i>Potassium chloride, combinations</i>                   | Syrup                    | 4  | 50  | 25  | 0   | 25  |
|                                       | <i>Potassium gluconate</i>                                | Syrup                    | 2  | 50  | 0   | 0   | 50  |
|                                       | <i>Calcium</i>                                            | Syrup                    | 2  | 50  | 0   | 50  | 0   |
|                                       | <i>Calcium carbonate</i>                                  | Tablet                   | 1  | 0   | 0   | 100 | 0   |
| Constipation                          | <i>Lactulose</i>                                          | Oral solution            | 6  | 33  | 50  | 17  | 0   |
|                                       | <i>Macrogol</i>                                           | Powder for oral solution | 2  | 100 | 0   | 0   | 0   |
| Functional gastrointestinal disorders | <i>Domperidone</i>                                        | Oral suspension          | 6  | 33  | 17  | 50  | 0   |
|                                       | <i>Phloroglucinol</i>                                     | Tablet                   | 1  | 0   | 0   | 0   | 100 |
| Acid related disorders                | <i>Omeprazole</i>                                         | Effervescent tablet      | 3  | 33  | 33  | 33  | 0   |
|                                       | <i>Alginate acid</i>                                      | Oral suspension          | 3  | 33  | 0   | 67  | 0   |
| Urologicals                           | <i>Sildenafil</i>                                         | Tablet                   | 3  | 0   | 0   | 33  | 67  |
| Beta blocking agents                  | <i>Propranolol</i>                                        | Tablet                   | 3  | 67  | 33  | 0   | 0   |
| Bile and liver therapy                | <i>Liver therapy</i>                                      | Oral solution            | 2  | 0   | 100 | 0   | 0   |
| Antihistamines                        | <i>Mequitazine</i>                                        | Syrup                    | 1  | 0   | 100 | 0   | 0   |
|                                       | <i>Desloratadine</i>                                      | Oral solution            | 1  | 0   | 100 | 0   | 0   |

|                                                                   |                           |                            |   |     |     |     |   |
|-------------------------------------------------------------------|---------------------------|----------------------------|---|-----|-----|-----|---|
| Antidiarrheals intestinal anti-inflammatory anti infective agents | <i>Diosmectite</i>        | Powder for oral suspension | 2 | 100 | 0   | 0   | 0 |
| Psychoanaleptics                                                  | <i>Piracetam</i>          | Oral solution              | 1 | 100 | 0   | 0   | 0 |
| Other alimentary tract and metabolism products                    | <i>Nitisinone</i>         | Capsule                    | 1 | 100 | 0   | 0   | 0 |
| Diuretics                                                         | <i>Furosemide</i>         | Tablet                     | 1 | 0   | 0   | 100 | 0 |
| Contrast media                                                    | <i>Diatrizoique acide</i> | Powder for oral solution   | 1 | 0   | 0   | 100 | 0 |
| Cardiac therapy                                                   | <i>Digoxin</i>            | Oral solution              | 1 | 100 | 0   | 0   | 0 |
| Antiemetics and antinauseants                                     | <i>Metopimazine</i>       | Oral solution              | 1 | 0   | 100 | 0   | 0 |

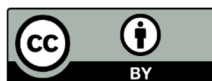

© 2020 by the authors. Submitted for possible open access publication under the terms and conditions of the Creative Commons Attribution (CC BY) license (<http://creativecommons.org/licenses/by/4.0/>).
